# Supplementary material for: Maternal Stress and Excessive Weight Gain in Infancy
Source: MDPI journal article supplement (doi:10.3390/ijerph19095743), 2022-05-09
Supplement: s1 [file s1]

Supplementary Table S1: Missing Data for Main Exposure, Outcome and Covariate Variables

| Variable                        | N (%)<br>Missing |             |            |            |
|---------------------------------|------------------|-------------|------------|------------|
|                                 | 3 months         | 6 months    | 9 months   | 12 months  |
| <i>Maternal</i>                 |                  |             |            |            |
| Marital status                  | 135 (20.3)       | 175 (26.3)  | 211 (31.7) | 203 (30.5) |
| Unemployed                      | 135 (20.3)       | 175 (26.3)  | 211 (31.7) | 202 (30.3) |
| Low income                      | 154 (23.1)       | 184 (27.6)  | 216 (32.4) | 204 (30.6) |
| Household number                | 139 (20.9)       | 184 (27.6)  | 223 (33.5) | 206 (30.9) |
| PSS score                       | 272 (40.8)       | 295 (44.3)  | 292 (43.8) | 312 (46.9) |
| <i>Infant</i>                   |                  |             |            |            |
| Rapid weight gain from baseline | N/A              | 231 (34.7)  | 263 (39.5) | 256 (38.4) |
| Weight for length z-score       | 153 (23.0)       | 198 (29.73) | 232 (34.8) | 217 (32.6) |

Supplementary Table S2: Associations Between Variables and Missingness for the Identification of Auxiliary Variables to be Used for Multiple Imputation

| Variable                                | Not Flagged for Missing | Flagged for Missing | P Value  |
|-----------------------------------------|-------------------------|---------------------|----------|
| <i>Maternal</i>                         |                         |                     |          |
| Age                                     | 28.1±5.8                | 26.2±5.4            | <0.0001* |
| Race (Black)                            | 64.9%                   | 79.85%              | <0.0001* |
| Ethnicity (Hispanic)                    | 7.5%                    | 5.2%                | 0.0137*  |
| Overweight/obese                        | 63.4%                   | 59.1%               | 0.0280*  |
| Prenatal diet quality (AHEI)            | 42.1+/-10.2             | 42.7 +/-11.6        | 0.5390   |
| Married/living with partner             | 62.0%                   | 51.0%               | <0.0001* |
| Highschool or higher                    | 55.3%                   | 48.1%               | 0.0002*  |
| Unemployed                              | 46.0%                   | 42.5%               | 0.1955   |
| Low income (<\$20,000/year)             | 52.9%                   | 56.3%               | 0.2108   |
| Household number                        | 3.6±2.1                 | 3.4±1.6             | 0.2196   |
| <i>Infant</i>                           |                         |                     |          |
| Gestational age at birth                | 38.7±1.5                | 38.4±1.7            | 0.0620   |
| Weight for length z-score               | 0.4±1.1                 | 0.5±1               | 0.2070   |
| Birthweight for gestational age z-score | -0.3±1                  | -0.3±0.9            | 0.6834   |
| Race (Black)                            | 61.8%                   | 77.3%               | <0.0001* |
| Ethnicity (Hispanic)                    | 11.5%                   | 6.7%                | <0.0001* |
| Infant sex (male)                       | 50.2%                   | 52.5%               | 0.2281   |
| Total weeks breastfed                   | 17.9±19.8               | 10.5±14.8           | <0.0001* |

Independent t-tests were used to compare normally distributed continuous variables, Wilcoxon rank sum test for non-normally distributed continuous variables, and Chi Square tests for categorical variables.

\  
Supplemental Table S3: Baseline Demographic Characteristics of the Nurture Cohort of Infants with and Without Rapid Weight Gain\* from 3 to 12 months and Unadjusted Risk Ratios.

| Variables<br>N (%) or mean $\pm$ SE   | Not Rapid<br>(n=227) | Rapid<br>(n=214) | RR<br>Exp( $\beta$ ) | 95% CI  |
|---------------------------------------|----------------------|------------------|----------------------|---------|
| <i>Maternal</i>                       |                      |                  |                      |         |
| Age                                   | 27.5 $\pm$ 0.3       | 27.0 $\pm$ 0.4   | 1.0                  | 1.0-1.0 |
| Race (Black)                          | 256(72.6)            | 220(70.2)        | 0.9                  | 0.8-1.1 |
| Ethnicity (Hispanic/Latinx)           | 19(5.3)              | 24(7.9)          | 1.2                  | 0.9-1.7 |
| Overweight or Obese Pre-pregnancy     | 199(56.4)            | 194(62.0)        | 1.1                  | 0.9-1.4 |
| Prenatal diet quality (AHEI)          | 42.0 $\pm$ 0.7       | 42.5 $\pm$ 0.7   | 1.0                  | 1.0-1.0 |
| Married or living with partner        | 203(57.6)            | 177(56.4)        | 1.0                  | 0.8-1.2 |
| Highschool degree or greater          | 277(78.6)            | 254(80.9)        | 1.1                  | 0.8-1.4 |
| Unemployed (looking for work)         | 68(19.4)             | 57(18.3)         | 1.0                  | 0.7-1.2 |
| Low Income(<20,000/year)              | 215(61)              | 184(58.6)        | 0.9                  | 0.8-1.2 |
| Number of people living in the home   | 3.6 $\pm$ 0.1        | 3.5 $\pm$ 0.1    | 1.0                  | 0.9-1.0 |
| <i>Infant</i>                         |                      |                  |                      |         |
| Gestational age at birth              | 38.4 $\pm$ 0.1       | 38.8 $\pm$ 0.1   | 1.1                  | 1.0-1.1 |
| Birth weight for GA z-score           | -0.5 $\pm$ 0.1       | -0.1 $\pm$ 0.1   | 1.2                  | 1.1-1.3 |
| Small for GA (<10 <sup>th</sup> %ile) | 43(12.3)             | 22(7.0)          | 0.7                  | 0.5-1.0 |
| Large for GA (>90 <sup>th</sup> %ile) | 29(8.3)              | 36(11.5)         | 1.2                  | 0.9-1.6 |
| Sex Male                              | 189(53.7)            | 152(48.4)        | 0.9                  | 0.7-1.1 |
| Weeks Breastfed                       | 16.2 $\pm$ 1.1       | 13.0 $\pm$ 1.0   | 1.0                  | 1.0-1.0 |
| Breastfed 6 months or greater         | 86(24.5)             | 64(20.3)         | 0.9                  | 0.5-1.0 |
| Breastfed 12 months                   | 58(16.4)             | 32(10.3)         | 0.7                  | 0.5-1.0 |

Values were calculated with log-binomial models

\*Rapid weight gain defined as a change in WFL z-score >0.67 representing upward crossing of percentile bands on WHO growth chart

### Perceived Stress Scale

The questions in this scale ask you about your feelings and thoughts during the last month. In each case, you will be asked to indicate by circling how often you felt or thought a certain way.

0 = Never 1 = Almost Never 2 = Sometimes 3 = Fairly Often 4 = Very Often

1. In the last month, how often have you been upset because of something that happened unexpectedly?
2. In the last month, how often have you felt that you were unable to control the important things in your life?
3. In the last month, how often have you felt nervous and "stressed"?
4. In the last month, how often have you felt confident about your ability to handle your personal problems?
5. In the last month, how often have you felt that things were going your way?
6. In the last month, how often have you found that you could not cope with all the things that you had to do?
7. In the last month, how often have you been able to control irritations in your life?
8. In the last month, how often have you felt that you were on top of things?
9. In the last month, how often have you been angered because of things that were outside of your control?
10. In the last month, how often have you felt difficulties were piling up so high that you could not overcome them?
